# Supplementary material
Source: PubMed Central journal article supplement (PMC6363882)
Supplement: NIHMS995678-supplement-1.pdf [file NIHMS995678-supplement-1.pdf]

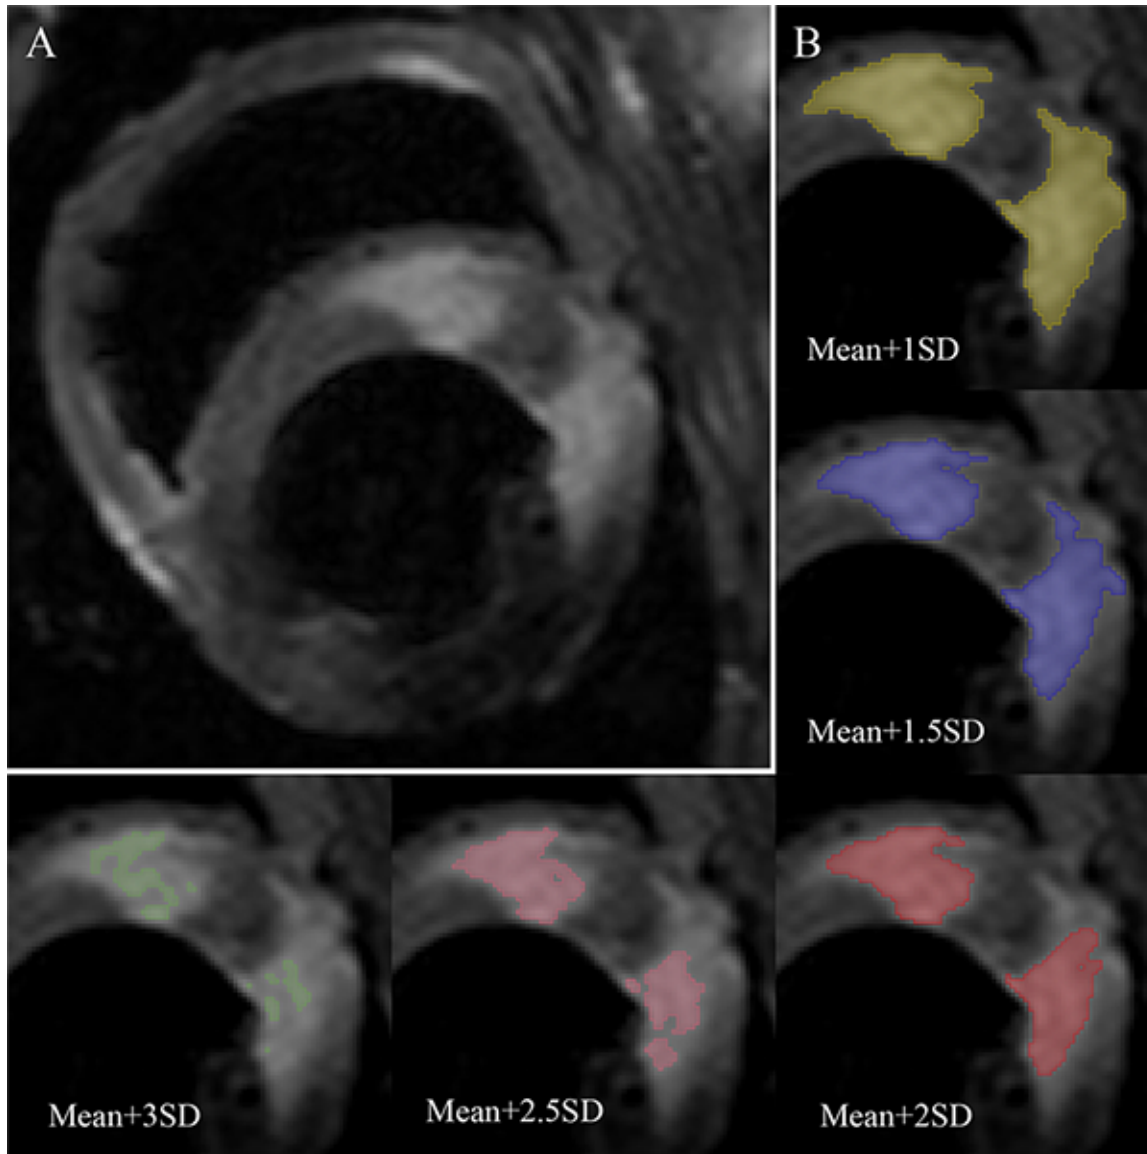

386

387 Quantification of Edema volume using different thresholds. Panel A shows a T2w MR image

388 done for edema assessment. Panel B highlights the extent of area that is above the different

389 thresholds set based on the average intensity of the normal area. Mean+2SD homogeneously

390 covered the area of enhancement.
